# Supplementary material
Source: ML conference proceedings conference paper supplement (https://proceedings.neurips.cc/paper_files/paper/2022/hash/7c61aa6a4dcf12042fe12a31d49d6390-Abstract.html)
Supplement: Supplementary file 1 [file 7c61aa6a4dcf12042fe12a31d49d6390-Supplemental-Conference.zip]

Archive with 6 entries (4 files):
- Supplements/
- Supplements/Code/
- Supplements/Code/README.txt
- Supplements/Code/run_experiments.ipynb
- Supplements/Code/utils.py
- Supplements/Sefidgaran22withAppendices-Neurips.pdf
